# Supplementary material for: Replacing a nitrogen heteroatom in a molecular Eu complex with a phenyl moiety facilitated sunlight-like emissions for sustainable white LEDs and non-contact thermometers
Source: Royal Society of Chemistry journal article supplement (doi:10.1039/d5qi02371h), 2026-01-01
Supplement: d5qi02371h1.pdf [file d5qi02371h1.pdf]

## **Hetero Atom (Nitrogen) replaced by Phenyl Insertion in Molecular Eu-complex Facilitated Sun Light-like Emission for Sustainable White LEDs and Non- Contact Thermometer**

Swetha Maredi<sup>a,b</sup>, Rohit Basotra<sup>a</sup>, Takashi Nakanishi<sup>b</sup>, and Sivakumar Vaidyanathan<sup>a\*</sup>

<sup>a</sup>Department of Chemistry, Indian Institute of Technology, Hyderabad

Kandi, Sangareddy-502285, Telangana, India.

<sup>b</sup>Research Center for Materials Nanoarchitectonics (MANA), National Institute for Materials Science  
(NIMS), Tsukuba 305-0044, Japan

---

\* To whom correspondence should be addressed. Email: [vsiva@chy.iith.ac.in](mailto:vsiva@chy.iith.ac.in) (Sivakumar Vaidyanathan).

## Contents:

- Synthetic Procedure (Ligand and Eu-Complexes)
- **Figure SI1**  $^1\text{H}$  NMR spectrum of L-DpPh
- **Figure SI2.**  $^1\text{H}$  NMR spectrum of L-DpPh
- **Figure SI3**  $^{13}\text{C}$  NMR spectrum of L-DpPh
- **Figure SI4** IR spectrum of ligand and complexes
- **Figure SI5** Linear fitting plots of  $[\text{Eu}(\text{TTA})_3\text{L-DpPh}]$  and  $[\text{Eu}(\text{DBM})_3\text{L-DpPh}]$
- **Fig. SI 6** 77 K Phosphorescence spectra of L-DpPh
- **Fig. SI 7** UV-DRS absorption spectra of L-DpPh,  $[\text{Eu}(\text{TTA})_3\text{L-DpPh}]$  and  $[\text{Eu}(\text{DBM})_3\text{L-DpPh}]$
- **Fig. SI 8** UV-DRS reflectance spectra of L-DpPh,  $[\text{Eu}(\text{TTA})_3\text{L-DpPh}]$  and  $[\text{Eu}(\text{DBM})_3\text{L-DpPh}]$
- **Table ST.1** Comparison of L-DpPh with the previously reported ligand L-TPA
- **Table ST.2** The computed vertical transitions and their oscillator strengths ( $f$ ) and configuration of the ligand L-DpPh.
- Optimised coordinates  $x$ ,  $y$ ,  $z$  of L-DpPh
- Imaginary frequencies of the optimised geometries of L-DpPh
- **Fig. SI 9.** PXRD pattern of the complexes
- **Fig. SI 10** EL spectrum of fabricated WLEDs by using n-UV LED (390 nm, 20A forward bias current) for  $[\text{Eu}(\text{TTA})_3\text{L-DpPh}]$  with (a) 5 wt% and (b) 10 wt% in PMMA

## SI (ia) Experimental section

### General information for Measurements

For recording the  $^1\text{H}$  and  $^{13}\text{C}$ -NMR spectra, the AV 400 Advance-III 400MHz Fourier transform nuclear magnetic resonance (FT-NMR) Spectrometer, Bruker Ascend<sup>TM</sup> 600, was used. All the  $^1\text{H}$  and  $^{13}\text{C}$ -NMR spectra were recorded in deuterated chloroform solution, and tetramethylsilane (TMS) was used as a standard reference for chemical shift measurement. The Fourier transform infrared spectroscopy (FTIR) was executed by JASCO, in the spectrum range of  $400 - 4000\text{ cm}^{-1}$  by making KBr pellets. The CIE color coordinate for all emission spectra is calculated by MATLAB software. XPS was measured using the XPS AXIS SUPRA equipment (serial No. C332905/010). The absorption spectra of all the synthesized compounds in solution form were measured utilizing a UV-Visible spectrophotometer (JASCO V-730). The lifetimes of the Eu(III) complexes and the ligand were measured at 298 K with Edinburgh Instruments FLS 1000 based on the time-correlated single photon counting technology. A pulsed xenon lamp was used as the excitation source, and the signals were detected with a photomultiplier. All the measurements were carried out at room temperature (RT).

### Synthesis of 5'-phenyl-[1,1':3',1''-terphenyl]-4-carbaldehyde (I):

[1,1':3',1''-terphenyl]-5'-ylboronic acid,  $[\text{Pd}(\text{PPh})_3\text{OAc}]$ ,  $\text{K}_2\text{CO}_3$ , and 4-bromobenzaldehyde were taken in a round-bottomed flask, and ethanol, toluene, and water were added in 1:2:1 ratio. This mixture was heated at  $90\text{ }^\circ\text{C}$  for 12 hours. The mixture was filtered by using Celite, and the organic layer was extracted with ethyl acetate and dried over  $\text{Na}_2\text{SO}_4$ . The crude was purified using a 10:0.1 Hexane: ethyl acetate mixture. The product was obtained as a white solid (60% yield),  $^1\text{H}$  NMR (400 MHz,  $\text{CDCl}_3$ )  $\delta$  10.09 (s, 1H), 8.00 (d,  $J = 8.2\text{ Hz}$ , 1H), 7.86 (dd,  $J = 6.6, 4.9\text{ Hz}$ , 1H), 7.82 (d,  $J = 1.6\text{ Hz}$ , 1H), 7.73 – 7.69 (m, 2H), 7.51 (dd,  $J = 10.4, 4.7\text{ Hz}$ , 2H), 7.42 (dd,  $J = 8.3, 6.4\text{ Hz}$ , 1H).

### Synthesis of 3-(5'-phenyl-[1,1':3',1''-terphenyl]-4-yl)-1-(pyridin-2-yl)imidazo[1,5-a]pyridine (L-DpPh):

The ligand (L-DpPh) was synthesised by following the procedure. 2'-Dipyridyl ketone (2 g, 10.85 mmol) was taken in a round-bottomed flask, and to this, glacial acetic acid (15 mL) was added at room temperature (RT). To this reaction mixture, the aldehyde (Intermediate I) (4.05 g, 11.94 mmol) and ammonium acetate (4.18, 54.28 mmol) were subsequently added. Then, the resultant mixture was stirred continuously for 12 hr at 110 °C. The progress of the reaction was monitored by TLC (ethyl acetate-pet ether, 1:9). As the reaction mixture was acidic, it was neutralized by mixing with a small amount of water and an ammonium hydroxide (NH<sub>4</sub>OH) solution. The obtained solid was filtered and dissolved in dichloromethane, and then dried with anhydrous sodium sulphate. The solvent was vaporised to get the crude compound (0.71 g). This was purified by using column chromatography by using silica gel and eluent as 5% methanol in chloroform. The obtained product was dissolved in a minimum amount of THF solution and an excess amount of hexane was added to the same, a pale yellowish green solid was formed 450 mg (50.00%). <sup>1</sup>H NMR (400 MHz, CDCl<sub>3</sub>) δ 8.76 (d, *J* = 9.2 Hz, 1H), 8.67 (d, *J* = 4.7 Hz, 1H), 8.36 (d, *J* = 7.2 Hz, 1H), 8.30 (d, *J* = 8.0 Hz, 1H), 7.98 (d, *J* = 8.4 Hz, 2H), 7.91 – 7.82 (m, 5H), 7.74 (d, *J* = 7.1 Hz, 5H), 7.51 (t, *J* = 7.5 Hz, 4H), 7.43 (d, *J* = 7.4 Hz, 2H), 7.16 – 7.11 (m, 1H), 7.01 – 6.94 (m, 1H), 6.71 (t, *J* = 7.3 Hz, 1H).

<sup>13</sup>C NMR (400 MHz, CDCl<sub>3</sub>) δ 154.68, 148.69, 142.60, 141.55, 141.50, 141.06, 137.86, 136.63, 130.53, 129.23, 128.94, 128.78, 127.94, 127.69, 127.41, 125.65, 125.08, 121.88, 121.77, 121.39, 120.57, 120.22, 114.19.

The synthesis of Eu(III) chloride (EuCl<sub>3</sub> · 6H<sub>2</sub>O, Sigma Aldrich, 99.9%) from Eu(III) oxide is done by the well-known process. The resultant product (EuCl<sub>3</sub> · 6H<sub>2</sub>O) was then treated with an alcoholic solution of TTA (3 eq. BLD Pharma, 99 %) in the presence of 1 N sodium hydroxide solution (3.1 eq.) to get Eu(TTA)<sub>3</sub>(H<sub>2</sub>O)<sub>2</sub>. The same procedure was used to synthesize Eu(DBM)<sub>3</sub>(H<sub>2</sub>O)<sub>2</sub> but used DBM (BLD Pharma, 99 %) (3eq) instead of TTA.

**Synthesis of [Eu(TTA)<sub>3</sub>L-DpPh]:**

The precursor Eu(TTA)<sub>3</sub>(H<sub>2</sub>O)<sub>2</sub> (0.20 g, 0.23 mmol) in dry THF (20 mL) was taken in a 2-neck round bottom flask and stirred continuously until a solution was clear. After 20 minutes, the synthesized ligand L-DpPh (0.07 g, 0.23) pre-dissolved in dry THF was added drop by drop slowly. The reaction mixture was allowed to stir for 6 hours at 60 °C in inert condition. To this solution, excess hexane was added along the sides of the round-bottom flask resulted in the formation of a precipitate. The resulting mixture was filtered and subjected to several washings with hexane to obtain final complex in powder form (pale yellow color solid with 110 mg (~73.4%)). Elemental Analysis: Anal. Calc. for. C<sub>60</sub>H<sub>37</sub>EuF<sub>9</sub>O<sub>6</sub>S<sub>3</sub>; C, 54.80; H, 2.84; N, 3.20; Found: C, 54.81; H, 2.85; N, 3.21;

**Synthesis of [Eu(DBM)<sub>3</sub>L-DpPh]:**

The precursor Eu(DBM)<sub>3</sub>(H<sub>2</sub>O)<sub>2</sub> (0.20 g, 0.23 mmol) in dry THF (20 mL) was taken in a 2-neck round-bottom flask and stirred continuously until a solution was clear. After 20 minutes, the synthesized ligand L-DpPh (0.07 g, 0.23), pre-dissolved in dry THF, was added drop by drop slowly. The reaction mixture was allowed to stir for 6 hours at 60 °C in an inert condition. To this solution, excess hexane was added along the sides of the round-bottom flask, resulting in the formation of a precipitate. The resulting mixture was filtered and subjected to several washings with hexane to obtain final complex in powder form (pale yellow color solid with 110 mg (~73.4%)). Elemental Analysis: Anal. Calc. for. C<sub>81</sub>H<sub>58</sub>EuN<sub>3</sub>O<sub>6</sub>; C, 73.63; H, 4.42; N, 3.18; Found: C, 73.64; H, 4.43; N, 3.17;

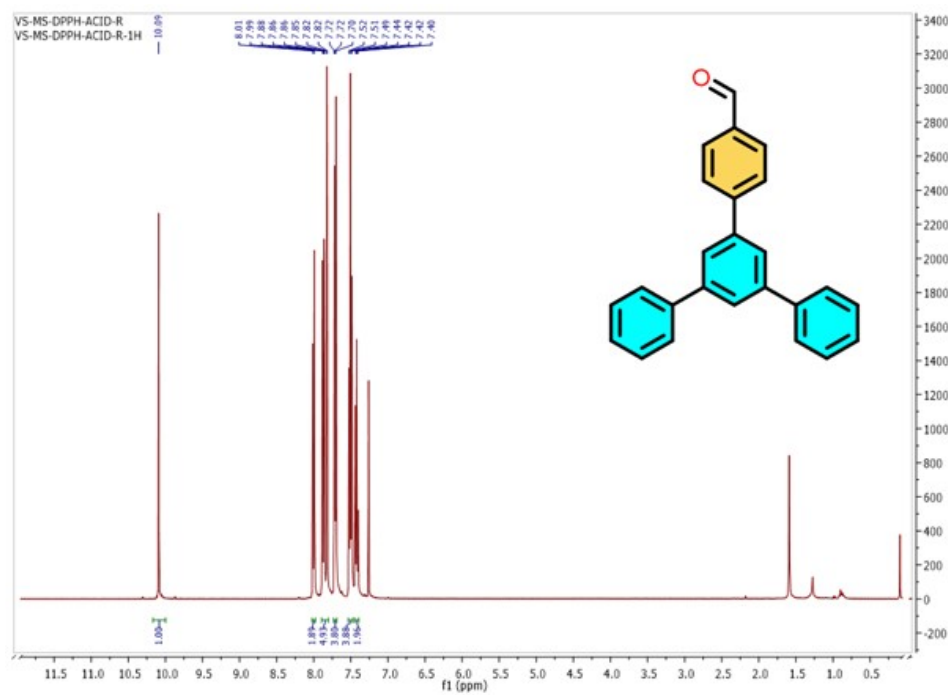

**Fig. SI 1**  $^1\text{H}$  NMR spectrum of aldehyde Intermediate – I

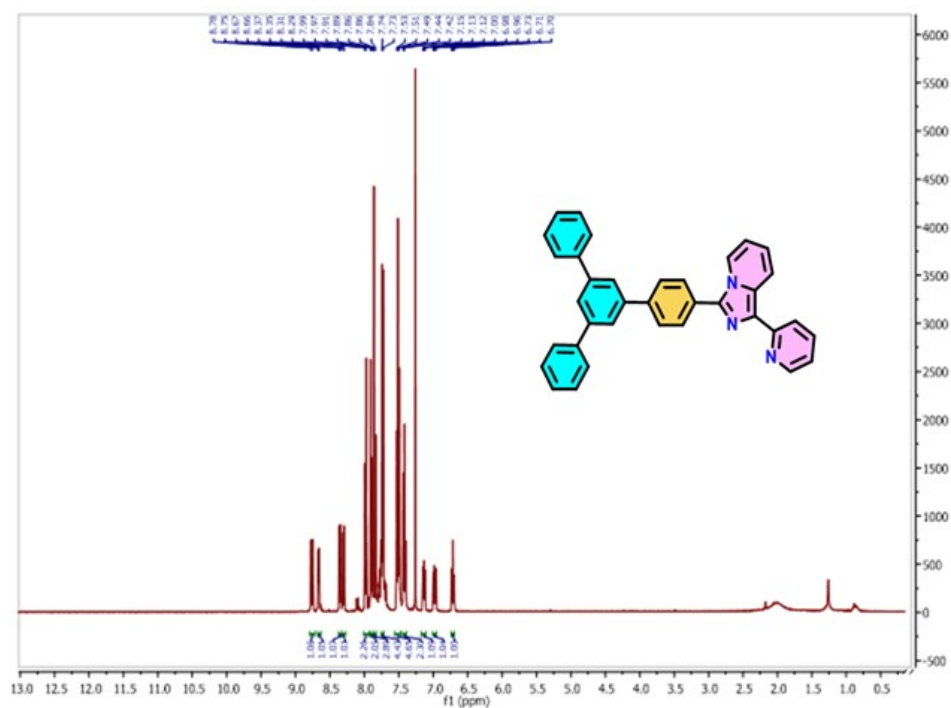

**Fig. SI 2**  $^1\text{H}$  NMR spectrum of L-DpPh

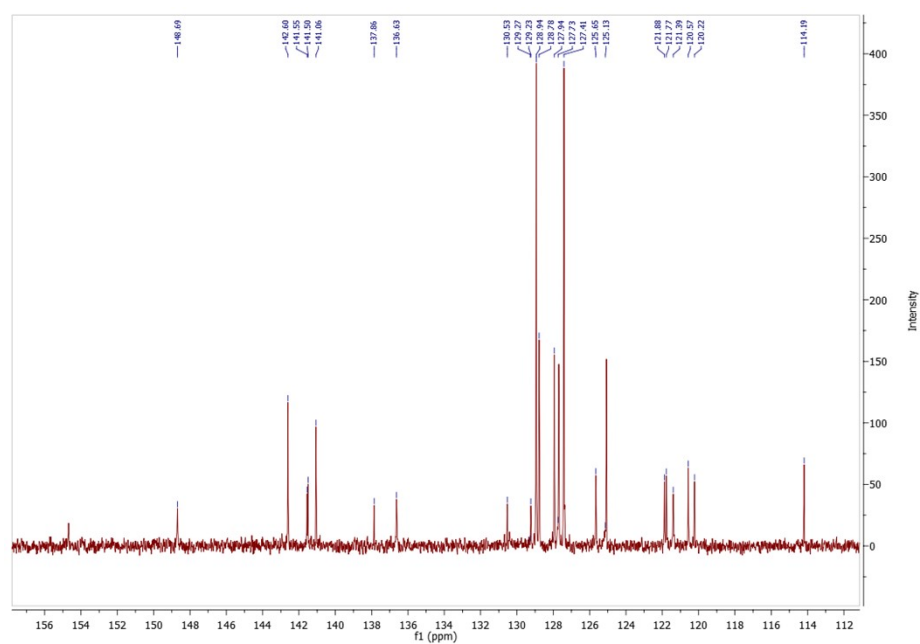

**Fig. SI 3**  $^{13}\text{C}$  NMR spectrum of L-DpPh

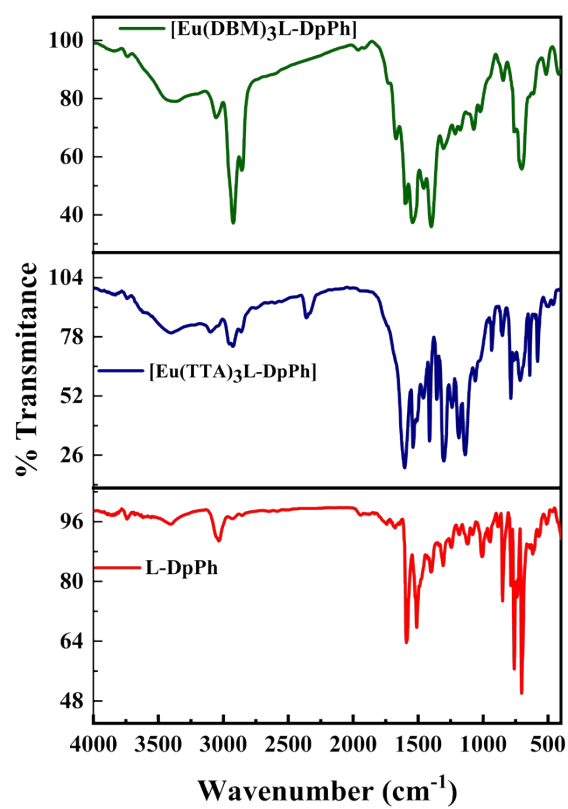

**Fig. S14.** FT-IR spectrum of L-DpPh

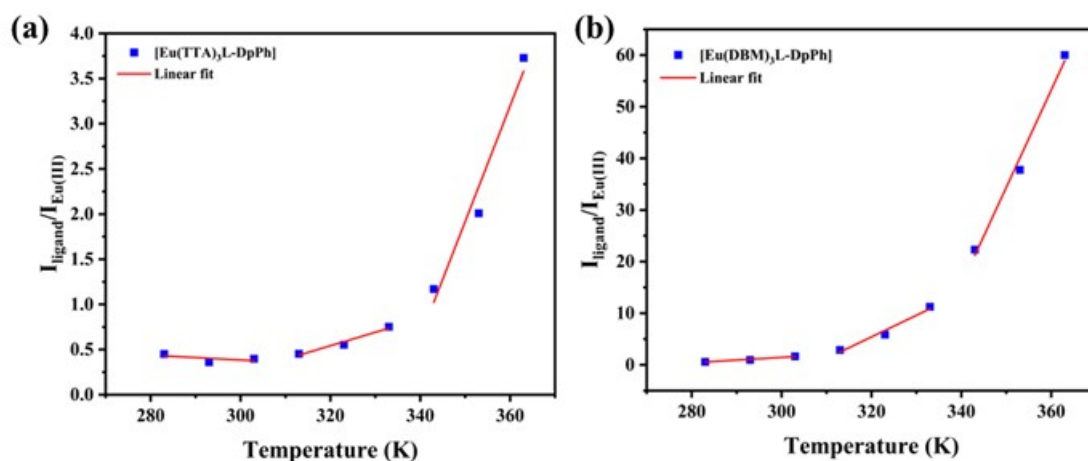

**Fig. SI 5** Linear fitting plot of  $I_{\text{lig}}/I_{\text{Eu}}$  vs Temperature for the complexes (a)  $[\text{Eu}(\text{TTA})_3\text{L-DpPh}]$ , (b)  $[\text{Eu}(\text{DBM})_3\text{L-DpPh}]$

### 77K Phosphorescence spectra:

To determine the triplet level energies, a common practice can be used, i.e., the analogue of non-emitting lanthanide ion<sup>1</sup> ( $\text{La}^{3+}$ ,  $\text{Gd}^{3+}$ , and  $\text{Lu}^{3+}$ ). We have used  $\text{Gd}(\text{III})$ , as the emitting level  $^6\text{P}_{7/2}$  of  $\text{Gd}(\text{III})$ , which has an energy higher energy and is hard to accept energy from the ligand<sup>2</sup>. Therefore, the triplet level emission of the ligand can be estimated by 77 K phosphorescence spectra.

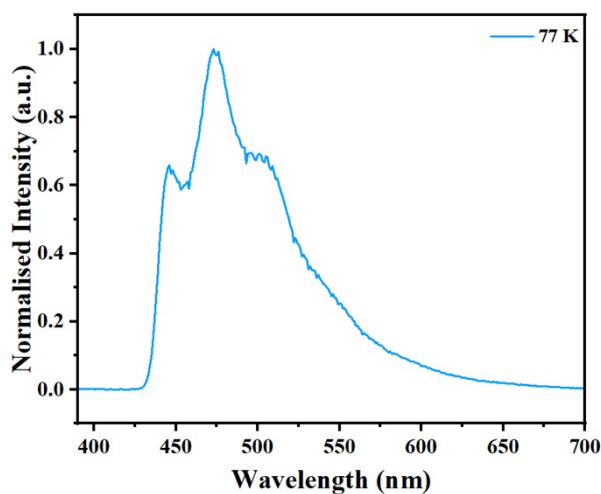

**Fig. SI 6** 77 K Phosphorescence spectra



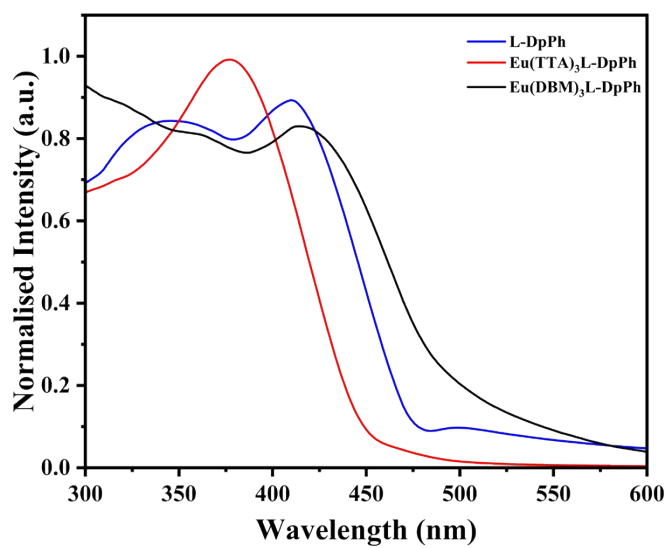

**Fig. SI 7** UV-DRS absorption spectra of L-DpPh, [Eu(TTA)<sub>3</sub>L-DpPh] and [Eu(DBM)<sub>3</sub>L-DpPh]

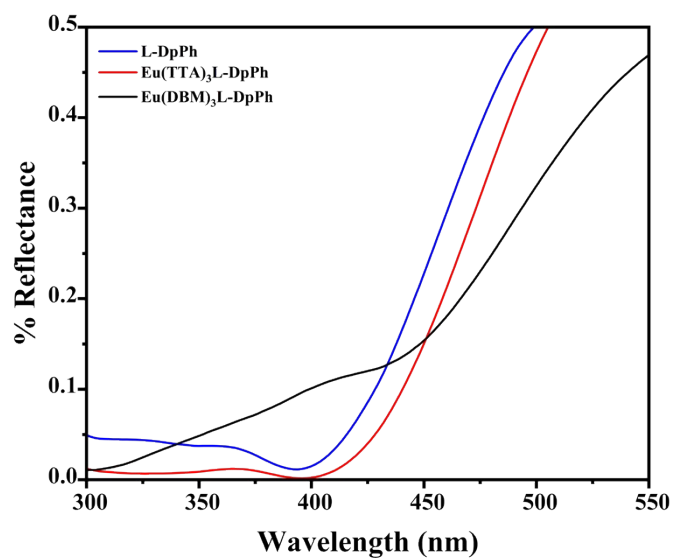

**Fig. SI 8** UV-DRS reflectance spectra of L-DpPh, [Eu(TTA)<sub>3</sub>L-DpPh] and [Eu(DBM)<sub>3</sub>L-DpPh]

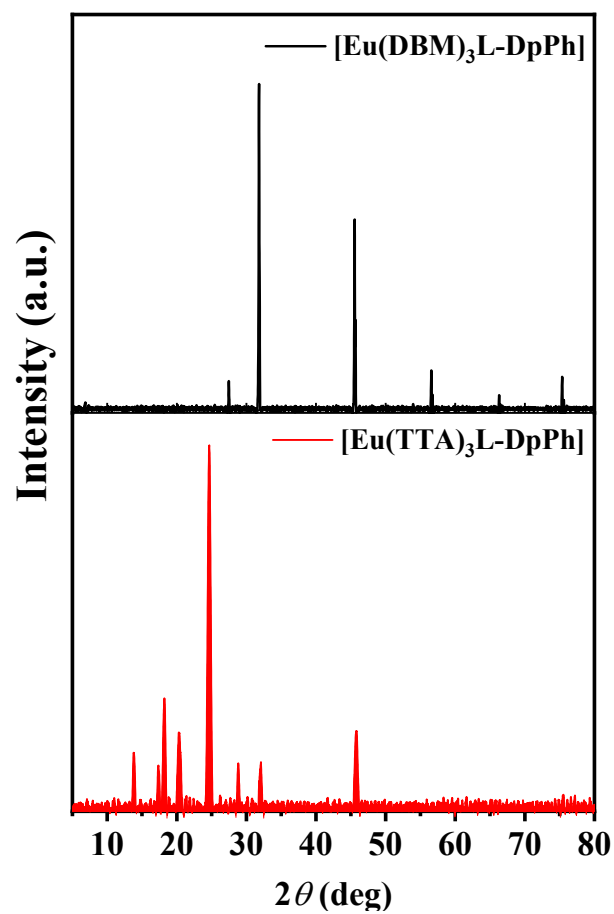

**Fig. SI 9.** PXRD pattern of the complexes

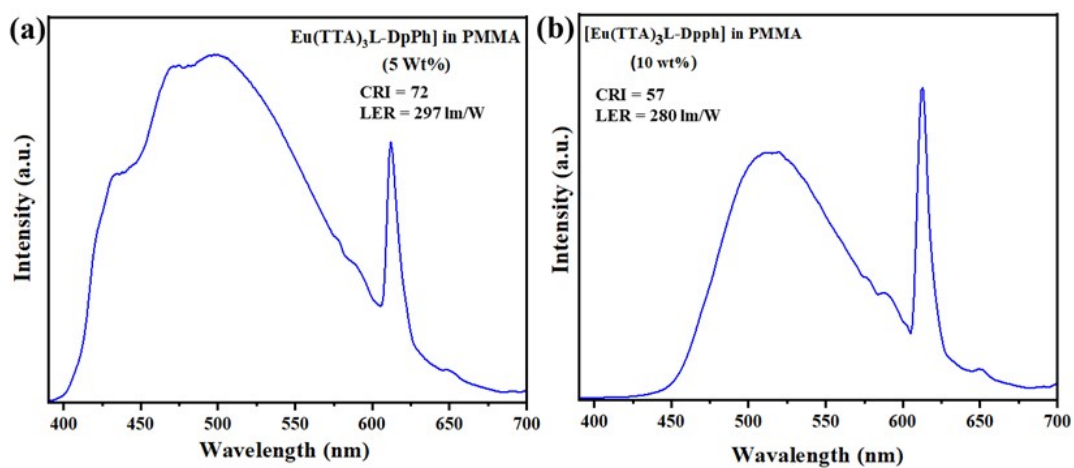

**Fig. SI 10** EL spectrum of fabricated WLEDs by using n-UV LED (390 nm, 20A forward bias current) for  $[\text{Eu}(\text{TTA})_3\text{L-DpPh}]$  with (a) 5 wt% and (b) 10 wt% in PMMA

## SI (ib) DFT Analysis

### Density Functional Theory calculation

The ligand sub-atomic structures were optimized within the density functional theory (DFT) framework utilizing B3LYP/6-31G (d, p) level of theory. A UV-visible spectrum of the molecule is obtained by exciting the molecule vertically after conformation of the ground state geometry for the ligand. Further, to depict PL emission and excitation mechanism of the Eu(III) complex, the triplet energized condition of the ligand is additionally accessed by utilizing the same procedure specified previously. The optimization study of the ligand is effectively accomplished by the G16W program.

**Table ST.1** Comparison of the values of HOMO, LUMO, Eg, S<sub>1</sub>, T<sub>1</sub>,  $\lambda_{em}$  (in solid) L-DpPh with the previously reported ligand L-TPA<sup>3</sup>

| Ligand | HOMO<br>(eV)                                                                                 | LUMO<br>(eV)                                                                                 | Eg<br>(eV) | S <sub>1</sub><br>(eV) | T <sub>1</sub><br>(eV) | $\lambda_{em}$<br>(Solid)<br>(nm) |
|--------|----------------------------------------------------------------------------------------------|----------------------------------------------------------------------------------------------|------------|------------------------|------------------------|-----------------------------------|
| L-TPA  | 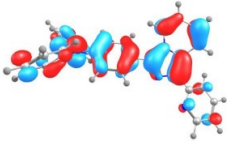<br>-4.74 | <br>-1.14 | 3.60       | 3.17                   | 2.30                   | 553                               |
| L-DpPh | <br>-5.02 | <br>-1.27 | 3.75       | 3.23                   | 2.23                   | 460                               |

**Table ST.2** The computed vertical transitions and their oscillator strengths ( $f$ ) and configuration of the ligand L-DpPh.

| Luminophores             | State | Energy (eV) | $\lambda_{\max}$ (nm) | $f$    | Configuration                                                                                                                   |
|--------------------------|-------|-------------|-----------------------|--------|---------------------------------------------------------------------------------------------------------------------------------|
| <b>L-DpPh</b><br>Singlet | Gas   | 3.2367      | 382.41                | 0.1023 | HOMO→LUMO (58.90 %)                                                                                                             |
|                          |       | 3.4174      | 368.38                | 0.7705 | HOMO→LUMO (33.95 %)<br>HOMO→LUMO+1 (61.08 %)                                                                                    |
|                          |       | 3.7372      | 314.43                | 0.0046 | HOMO→LUMO+2 (69.04 %)                                                                                                           |
|                          |       |             |                       |        |                                                                                                                                 |
| Triplet                  | Gas   | 2.2352      | 538.25                | 0      | HOMO→LUMO (63.86 %)                                                                                                             |
|                          |       | 2.6462      | 491.03                | 0      | HOMO→LUMO (17.13 %)<br>HOMO→LUMO+1 (58.62 %)<br>HOMO→LUMO+3 (11.75 %)                                                           |
|                          |       | 3.0744      | 394.56                | 0      | HOMO-2→LUMO (14.23 %)<br>HOMO-2→LUMO+1 (22.75 %)<br>HOMO-2→LUMO+4 (16.13 %)<br>HOMO-1→LUMO+2 (41.82 %)<br>HOMO→LUMO+3 (31.12 %) |

**Optimised Cartesian coordinates of L-DpPh:****L-DpPh:****Optimized Cartesian coordinates:**

symmetry c1

|   | <i>x</i>     | <i>y</i>     | <i>z</i>     |
|---|--------------|--------------|--------------|
| C | -4.421087000 | 1.296837000  | -0.185161000 |
| C | -3.021610000 | 1.194035000  | -0.266356000 |
| C | -2.360792000 | -0.021466000 | -0.015091000 |
| C | -3.130581000 | -1.148936000 | 0.322111000  |
| C | -4.531765000 | -1.079223000 | 0.407935000  |
| C | -5.161760000 | 0.150903000  | 0.152047000  |
| H | -2.444152000 | 2.057444000  | -0.578318000 |
| H | -2.630491000 | -2.077948000 | 0.573479000  |
| H | -6.242368000 | 0.217432000  | 0.217005000  |
| C | -5.330416000 | -2.278055000 | 0.781633000  |
| C | -6.461879000 | -2.164744000 | 1.613577000  |
| C | -4.974987000 | -3.557913000 | 0.311770000  |
| C | -7.212091000 | -3.291394000 | 1.961927000  |
| H | -6.737772000 | -1.192600000 | 2.009407000  |
| C | -5.723873000 | -4.684902000 | 0.661623000  |
| H | -4.121728000 | -3.664251000 | -0.350598000 |
| C | -6.846419000 | -4.556688000 | 1.487944000  |
| H | -8.075683000 | -3.182471000 | 2.610720000  |
| H | -5.436311000 | -5.660747000 | 0.282532000  |
| H | -7.428442000 | -5.431621000 | 1.759442000  |
| C | -5.105588000 | 2.587427000  | -0.468871000 |
| C | -6.334591000 | 2.620093000  | -1.157123000 |

|   |              |              |              |
|---|--------------|--------------|--------------|
| C | -4.541234000 | 3.810285000  | -0.054976000 |
| C | -6.977287000 | 3.832933000  | -1.420694000 |
| H | -6.773949000 | 1.692157000  | -1.509063000 |
| C | -5.182823000 | 5.023257000  | -0.320276000 |
| H | -3.607902000 | 3.806389000  | 0.498961000  |
| C | -6.404222000 | 5.040082000  | -1.003880000 |
| H | -7.919950000 | 3.835824000  | -1.959228000 |
| H | -4.733804000 | 5.953356000  | 0.014164000  |
| H | -6.902902000 | 5.981927000  | -1.209358000 |
| C | -0.880077000 | -0.110315000 | -0.104287000 |
| C | -0.247365000 | -1.265980000 | -0.598560000 |
| C | -0.058135000 | 0.957883000  | 0.312344000  |
| C | 1.142818000  | -1.349496000 | -0.689327000 |
| H | -0.850073000 | -2.106639000 | -0.926501000 |
| C | 1.327990000  | 0.883217000  | 0.219646000  |
| H | -0.513661000 | 1.847465000  | 0.734711000  |
| C | 1.957592000  | -0.268094000 | -0.298863000 |
| H | 1.587214000  | -2.278472000 | -1.028846000 |
| H | 1.951395000  | 1.702258000  | 0.558799000  |
| C | 3.418330000  | -0.290477000 | -0.343812000 |
| C | 5.512566000  | 0.108866000  | 0.214797000  |
| C | 5.572304000  | -0.740206000 | -0.905560000 |
| C | 3.890972000  | -1.710325000 | -2.401151000 |
| H | 2.842766000  | -1.792651000 | -2.642089000 |
| C | 4.886754000  | -2.241450000 | -3.171350000 |
| H | 4.621585000  | -2.802554000 | -4.059140000 |
| C | 6.260949000  | -2.038717000 | -2.830149000 |

|   |             |              |              |
|---|-------------|--------------|--------------|
| H | 7.036660000 | -2.457532000 | -3.460388000 |
| C | 6.590402000 | -1.290614000 | -1.723573000 |
| H | 7.624262000 | -1.088725000 | -1.474047000 |
| C | 6.620402000 | 0.665828000  | 0.992676000  |
| C | 7.825142000 | -0.042724000 | 1.177618000  |
| C | 8.859761000 | 0.539140000  | 1.912587000  |
| H | 7.932353000 | -1.047226000 | 0.784438000  |
| C | 7.438622000 | 2.439733000  | 2.258825000  |
| C | 8.670566000 | 1.809645000  | 2.465919000  |
| H | 9.790732000 | 0.002338000  | 2.064776000  |
| H | 7.239453000 | 3.421203000  | 2.678634000  |
| H | 9.447317000 | 2.294568000  | 3.046659000  |
| N | 6.437318000 | 1.897702000  | 1.539534000  |
| N | 4.197667000 | 0.373807000  | 0.520758000  |
| N | 4.214431000 | -0.985737000 | -1.261959000 |

**Imaginary frequencies of the optimised geometries of L-DpPh:**

| Mode | Frequency |
|------|-----------|
| 80   | 938.74    |
| 23   | 278.33    |
| 87   | 982.98    |
| 8    | 54.29     |
| 113  | 1187.87   |
| 112  | 1187.78   |
| 25   | 308.58    |
| 77   | 918.24    |
| 4    | 44.37     |
| 141  | 1480.75   |
| 90   | 999.21    |
| 13   | 122.75    |
| 6    | 48.66     |
| 134  | 1375.81   |
| 24   | 300.45    |
| 89   | 999.03    |

|     |         |
|-----|---------|
| 83  | 973.85  |
| 7   | 49.25   |
| 48  | 634.37  |
| 38  | 502.78  |
| 131 | 1362.76 |
| 16  | 151.46  |
| 37  | 461.48  |
| 17  | 192.92  |
| 20  | 239.47  |
| 15  | 143.63  |
| 1   | 10.83   |
| 26  | 326.82  |
| 96  | 1018.05 |
| 22  | 270.27  |
| 117 | 1211.46 |
| 27  | 351.77  |
| 14  | 126.34  |
| 10  | 77.96   |
| 3   | 24.4    |
| 21  | 241.22  |
| 52  | 658.29  |
| 73  | 862.1   |
| 2   | 17.07   |
| 86  | 978.34  |
| 18  | 203.93  |
| 97  | 1027.04 |
| 32  | 419.27  |
| 85  | 975.93  |
| 84  | 975.69  |
| 45  | 623.98  |
| 95  | 1015.73 |
| 34  | 423.45  |
| 19  | 218.93  |
| 28  | 371.32  |
| 72  | 861.57  |
| 88  | 988.62  |
| 42  | 597.31  |
| 76  | 906.96  |
| 79  | 937.17  |
| 50  | 637.9   |
| 93  | 1010.12 |
| 5   | 45.54   |
| 49  | 636.22  |
| 81  | 945.44  |
| 12  | 94.21   |
| 126 | 1325.53 |



|     |         |
|-----|---------|
| 183 | 3220.34 |
| 41  | 578.57  |
| 101 | 1068.3  |
| 105 | 1119.18 |
| 9   | 59.49   |
| 51  | 643.13  |
| 11  | 82.22   |
| 114 | 1199.88 |
| 33  | 420.15  |
| 161 | 1684.51 |
| 106 | 1119.81 |
| 29  | 391.58  |
| 107 | 1121.88 |
| 125 | 1325.31 |
| 119 | 1266.03 |
| 133 | 1369.47 |
| 166 | 3183.66 |
| 39  | 514.94  |
| 116 | 1211.11 |
| 120 | 1267.39 |
| 43  | 610.72  |
| 186 | 3268.24 |
| 160 | 1665.35 |
| 44  | 621.18  |
| 31  | 418.06  |
| 165 | 3183.34 |
| 30  | 415.65  |
| 135 | 1384.17 |
| 104 | 1110.29 |
| 78  | 924.76  |
| 118 | 1223.41 |
| 142 | 1494.18 |
| 103 | 1109.79 |
| 130 | 1349    |
| 143 | 1500.87 |
| 62  | 764.62  |
| 110 | 1169.25 |
| 150 | 1575.52 |
| 164 | 3177.2  |
| 58  | 725.52  |
| 139 | 1468.83 |
| 184 | 3221.42 |
| 100 | 1057.04 |
| 163 | 3176.98 |
| 68  | 837.49  |
| 63  | 768.13  |

|     |         |
|-----|---------|
| 111 | 1181.15 |
| 144 | 1509.96 |
| 174 | 3201.02 |
| 175 | 3201.99 |
| 71  | 860.56  |
| 92  | 1005.52 |
| 169 | 3192.37 |
| 35  | 435.34  |
| 122 | 1292.21 |
| 159 | 1660.03 |
| 70  | 842.76  |
| 128 | 1339.34 |
| 123 | 1303.46 |
| 94  | 1012.13 |
| 54  | 709.19  |
| 182 | 3212.11 |
| 99  | 1044.26 |
| 46  | 626.21  |
| 36  | 441.26  |
| 127 | 1327.57 |
| 185 | 3231.07 |
| 47  | 630.71  |
| 108 | 1146.24 |
| 91  | 1000.36 |
| 176 | 3202.41 |
| 102 | 1075.52 |
| 75  | 903.03  |
| 61  | 756.82  |
| 177 | 3204.75 |
| 167 | 3184.56 |
| 40  | 532.16  |
| 69  | 842.57  |
| 147 | 1541.46 |
| 137 | 1442.19 |
| 181 | 3207.98 |
| 154 | 1630.8  |
| 158 | 1659.23 |
| 178 | 3205.89 |
| 152 | 1620.22 |
| 121 | 1290.73 |
| 60  | 755.55  |
| 172 | 3197.22 |
| 129 | 1340.64 |
| 115 | 1210.86 |
| 151 | 1605.85 |
| 138 | 1451.19 |

|     |         |
|-----|---------|
| 56  | 716.04  |
| 57  | 717.66  |
| 53  | 662.55  |
| 168 | 3187.47 |
| 98  | 1037.93 |
| 65  | 780.82  |
| 66  | 782.55  |
| 136 | 1438.85 |
| 59  | 743.83  |
| 179 | 3206.54 |
| 170 | 3192.77 |
| 157 | 1644.02 |
| 146 | 1539.97 |
| 74  | 866.14  |
| 67  | 810.27  |
| 173 | 3198.64 |
| 124 | 1318.38 |
| 171 | 3193.48 |
| 109 | 1153.08 |
| 55  | 714.86  |
| 140 | 1473.14 |
| 180 | 3207.6  |
| 156 | 1642.48 |
| 82  | 964.39  |
| 64  | 779.61  |
| 153 | 1628.21 |
| 162 | 3154.95 |
| 132 | 1365.01 |
| 149 | 1567.51 |
| 145 | 1521.68 |
| 148 | 1556.31 |
| 155 | 1641.78 |

#### Reference:

1. M. D. Regulacio, M. H. Pablico, J. A. Vasquez, P. N. Myers, S. Gentry, M. Prushan, S.-W. Tam-Chang and S. L. Stoll, Luminescence of Ln (III) dithiocarbamate complexes (Ln<sup>1/4</sup> La, Pr, Sm, Eu, Gd, Tb, Dy), *Inorg. Chem.*, 2008, **47**, 1512– 1523.
2. S. Hussan, M. Farid, Y. Wang, A series of lanthanide–quinoxaline-2,3(1H,4H)- dione complexes containing 1D chiral Ln<sub>2</sub>O<sub>3</sub> (Ln <sup>1/4</sup> Eu, Tb, Sm, Dy) chains: luminescent properties and response to small molecules, *RSC Adv.*, 2021, 11, 33309

3. K. Singh, R. Boddula and S. Vaidyanathan, Versatile luminescent europium (III)–  $\beta$ -Diketonate-imidazo-bipyridyl complexes intended for white LEDs: A detailed photophysical and theoretical study, *Inorg. Chem.*, 2017, **56**, 9376–9390.
